# Supplementary material for: Production and Characterization of Polyethylene Terephthalate Nanoparticles
Source: MDPI journal article supplement (doi:10.3390/polym13213745), 2021-10-29
Supplement: s1 [file s1]

# Production and Characterization of Polyethylene Terephthalate Nanoparticles

Francesca Lionetto \*, Carola Esposito Corcione and Alfonso Maffezzoli

**Table S1.** Extract from XRD JCPDS No. 50-2275.

| <b>2<math>\theta</math></b> | <b>Int</b> | <b>h</b>  | <b>k</b>  | <b>l</b> |
|-----------------------------|------------|-----------|-----------|----------|
| 16.305                      | 306        | 0         | $\bar{1}$ | 1        |
| 17.745                      | 370        | 0         | 1         | 0        |
| 21.463                      | 218        | $\bar{1}$ | 1         | 1        |
| 22.724                      | 616        | $\bar{1}$ | 1         | 0        |
| 24.120                      | 131        | 0         | 1         | 1        |
| 24.966                      | 135        | $\bar{1}$ | 1         | 2        |
| 26.113                      | 999        | 1         | 0         | 0        |
| 28.149                      | 252        | 1         | $\bar{1}$ | 1        |
